# Supplementary material for: A Soil-Isolated Streptomyces spororaveus Species Produces a High-Molecular-Weight Antibiotic AF1 against Fungi and Gram-Positive Bacteria
Source: MDPI journal article supplement (doi:10.3390/antibiotics11050679), 2022-05-18
Supplement: s1 [file s1]

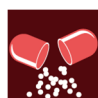

## Supplementary Materials:

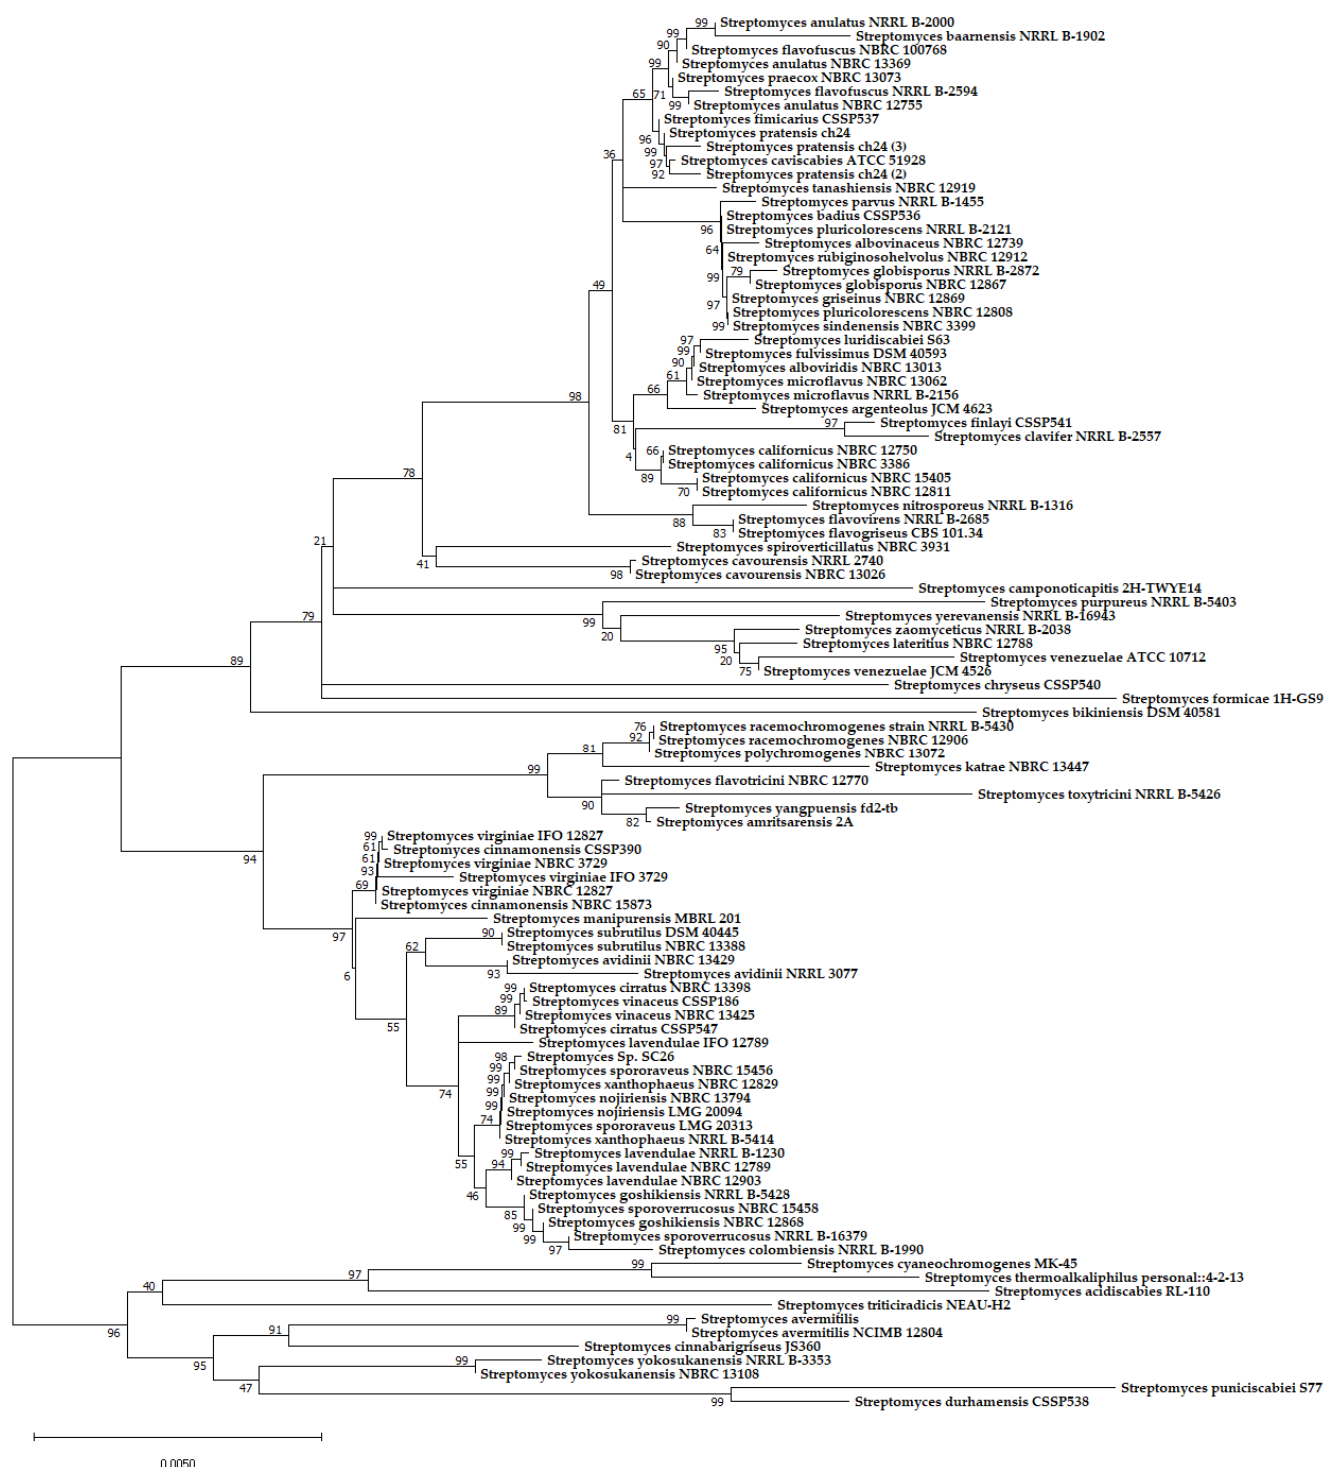

**Figure S1.** Phylogenetic tree of 16S ribosomal RNA of SC26. Neighbor-joining method was conducted based on 16S rRNA gene sequences from 100 *Streptomyces*. The bootstrap consensus tree which inferred from 1000 replicates is drawn to scale, with branch lengths, indicating the number of substitutions per site between species using MEGA 11.

**Table S1.** Genome Features of SC263.

| Feature                |       | Characteristics   |
|------------------------|-------|-------------------|
| Number of Contigs      |       | 3                 |
| Total GC Content       |       | 71.92%            |
| Length (base pair, bp) |       | 8,217,694         |
|                        | Ctg1  | 7,201,269         |
|                        | Ctg2  | 996,243           |
|                        | Ctg3  | 20,182            |
| Number of Genes        |       | 7,370             |
| Number of RNAs         |       | 91                |
|                        | rRNA  | 21                |
|                        | tRNA  | 73                |
|                        | ncRNA | 3                 |
| Number of Subsystems   |       | 319               |
| Number of Pseudogenes  |       | 197               |
| Number of BGCs         |       | 28 (see Table S2) |

**Table S2.** Biosynthetic Gene Clusters of *S. spororaveus* SC263 and NBRC 15456

| BGC Type                         | Most similar known cluster   | Notes                       | <i>S. spororaveus</i> SC263 |            | <i>S. spororaveus</i> NBRC 15456 |            |
|----------------------------------|------------------------------|-----------------------------|-----------------------------|------------|----------------------------------|------------|
|                                  |                              |                             | Region                      | Similarity | Region                           | Similarity |
| NRPS-like                        | lipstatin                    | NRP                         | 1-1                         | 42%        | 1                                | 35%        |
| T2PKS                            | spore pigment                | Polyketide                  | 1-2                         | 66%        | 2                                | 66%        |
| NRPS, NRPS-like                  | JBIR-126                     | NRP                         | 1-3                         | 92%        | 3                                | 96%        |
| NRPS, T1PKS                      | coelichelin                  | NRP                         | 1-4                         | 72%        | 4                                | 72%        |
| butyrolactone                    | neocarzinostatin             | Polyketide: type I          | 1-5                         | 4%         | 5                                | 4%         |
| NRPS, T1PKS                      | versipelostatin              | Polyketide                  | 1-6                         | 14%        | 6                                | 8%         |
| siderophore                      | desferrioxamin B             | Other                       | 1-7                         | 100%       | 7                                | 100%       |
| phenazine                        | lomofungin                   | Other                       | 1-8                         | 34%        | 8                                | 34%        |
| LAP                              |                              |                             | 1-9                         |            | 9                                |            |
| CDPS                             | BD-12                        | NRP                         | -                           | -          | 10                               | 17%        |
| siderophore                      | ficellomycin                 | NRP                         | 1-10                        | 5%         | 11                               | 5%         |
| T1PKS                            | ECO-02301                    | Polyketide                  | 1-11                        | 82%        | 12                               | 82%        |
| NRPS-like                        | meoabyssomicin / abyssomicin | Polyketide                  | 1-12                        | 12%        | -                                | -          |
| NRPS-like, T2PKS                 | polyketomycin                | Polyketide: type I +Type II | 1-13                        | 39%        | 13                               | 41%        |
| RiPP-like                        |                              |                             | 1-14                        |            | 14                               |            |
| terpene                          | toxoflavin / fer-venulin     | Other                       | 1-15                        | 14%        | 15                               | 14%        |
| lanthipeptide-class-iv           |                              |                             | 1-16                        |            | 16                               |            |
| NRPS                             | nogalamycin                  | Polyketide                  | 1-17                        | 30%        | 17                               | 30%        |
| terpene                          | hopene                       | Terpene                     | 1-18                        | 61%        | 18                               | 61%        |
| ectoine                          | ectoine                      | Other                       | 1-19                        | 100%       | -                                | -          |
| lanthipeptide-class-I            |                              |                             | 1-20                        |            | -                                | -          |
| T1PKS, hglE-KS                   | saframycin A / saframycin B  | NRP                         | 1-21                        | 4%         | 19                               | 4%         |
| lanthipeptide-class-iii, terpene | SapB                         | RiPP:Lanthipeptide          | 2-1                         | 100%       | 20                               | 100%       |
| terpene                          | 2-methylisoborneol           | Terpene                     | 2-2                         | 100%       | 21                               | 100%       |
| terpene                          | monensin                     | Polyketide                  | 2-3                         | 5%         | 22                               | 5%         |
| melanin                          | melanin                      | Other                       | 2-4                         | 28%        | 23                               | 28%        |
| siderophore                      |                              |                             | 2-5                         |            | 24                               |            |
| T3PKS                            | alkylresorcinol              | Polyketide                  | 2-6                         | 100%       | 25                               | 100%       |
| CDPS, NAPAA                      |                              |                             | 2-7                         |            | 26                               |            |
